# Supplementary material for: Two-dimensional MX2Y4 systems: ultrahigh carrier transport and excellent hydrogen evolution reaction performances
Source: Royal Society of Chemistry journal article supplement (doi:10.1039/d2cp04224j), 2023-01-01
Supplement: d2cp04224j1.pdf [file d2cp04224j1.pdf]

## Supporting Information

### Two-dimensional $\text{MX}_2\text{Y}_4$ systems: Ultrahigh carrier transport and excellent hydrogen evolution reaction performances

Kai Ren<sup>1,\*</sup>, Huabing Shu<sup>2</sup>, Ke Wang<sup>3</sup> and Huasong Qin<sup>4,\*</sup>

<sup>1</sup>School of Mechanical and Electronic Engineering, Nanjing Forestry University, Nanjing 211189, China

<sup>2</sup>School of Science, Jiangsu University of Science and Technology, Zhenjiang 212001, China

<sup>3</sup>School of Automation, Xi'an University of Posts & Telecommunications, Shaanxi, 710121, China

<sup>4</sup>Laboratory for Multiscale Mechanics and Medical Science SV LAB, School of Aerospace Xi'an Jiaotong University, Xi'an 710049, China

E-mail: [kairen@njfu.edu.cn](mailto:kairen@njfu.edu.cn) (Kai Ren), [huasongqin@xjtu.edu.cn](mailto:huasongqin@xjtu.edu.cn) (Huasong Qin)

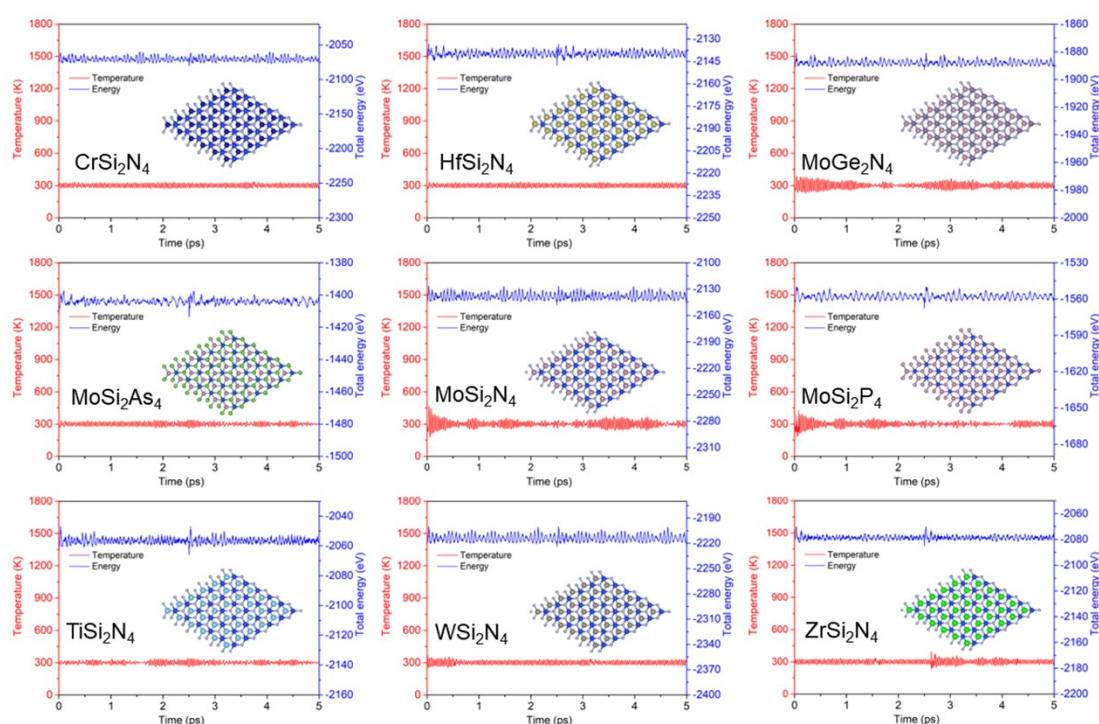

**Fig. S1.** The obtained temperature fluctuation and the total energy of the  $\text{MX}_2\text{Y}_4$  monolayer during the AIMD simulation, the insets are the atomic structure after 5 ps at 300 K.

Table S1. The calculated elastic constants of these  $\text{MX}_2\text{Y}_4$  monolayer.

| Monolayer                  | $C_{11}$ | $C_{22}$ | $C_{12}$ | $C_{66}$ |
|----------------------------|----------|----------|----------|----------|
| $\text{CrSi}_2\text{N}_4$  | 203.90   | 203.90   | 62.13    | 0.13     |
| $\text{HfSi}_2\text{N}_4$  | 180.39   | 180.39   | 59.03    | -0.04    |
| $\text{MoGe}_2\text{N}_4$  | 172.20   | 172.20   | 56.11    | 0.16     |
| $\text{MoSi}_2\text{As}_4$ | 72.32    | 72.32    | 21.08    | -0.02    |
| $\text{MoSi}_2\text{N}_4$  | 213.81   | 213.81   | 61.38    | 0.14     |
| $\text{MoSi}_2\text{P}_4$  | 86.28    | 86.28    | 22.79    | 0.09     |
| $\text{TiSi}_2\text{N}_4$  | 192.78   | 192.78   | 60.41    | 0.11     |
| $\text{WSi}_2\text{N}_4$   | 222.65   | 222.65   | 62.28    | -0.05    |

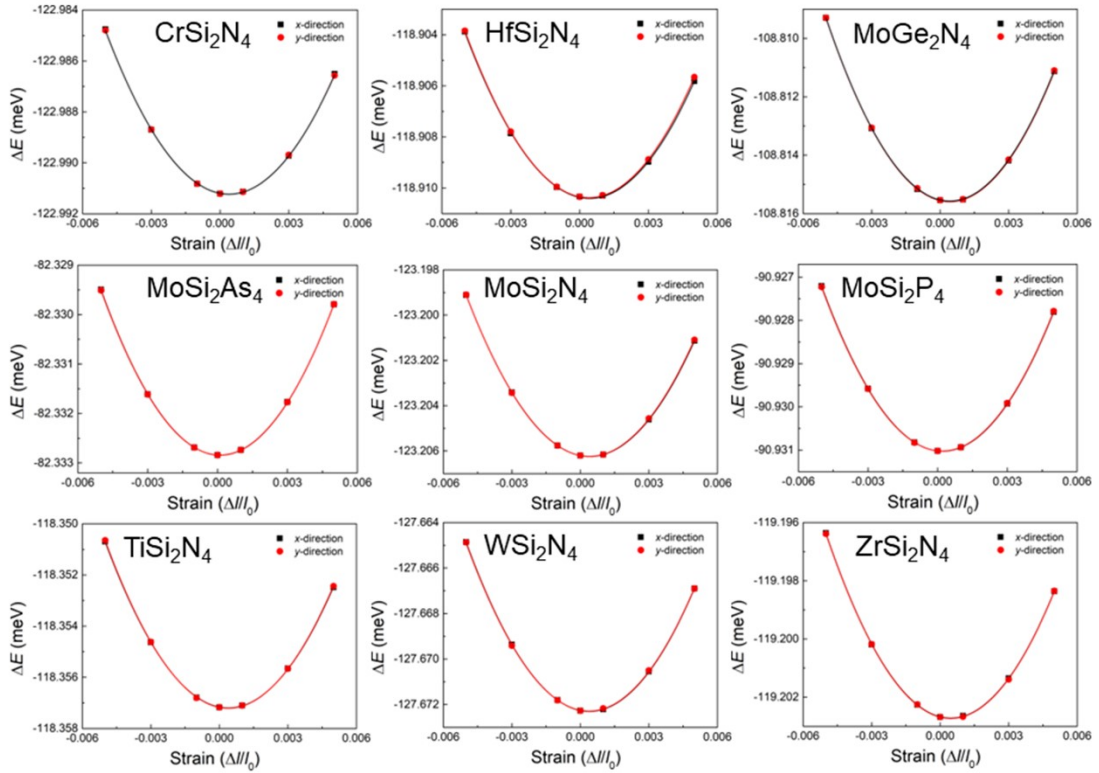

Fig. S2. The obtained energy difference of the  $\text{MX}_2\text{Y}_4$  monolayer under the external strain.

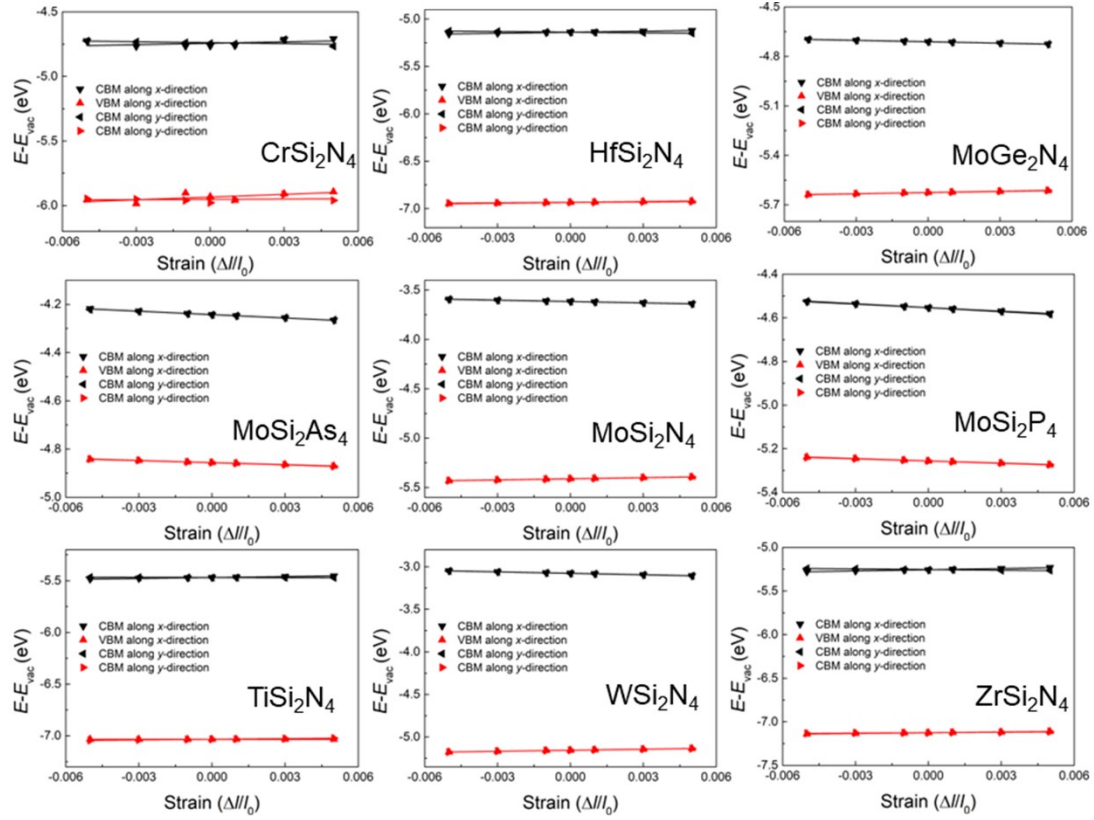

**Fig. S3.** The calculated band edge position difference of the  $\text{MX}_2\text{Y}_4$  monolayer under the external strain.

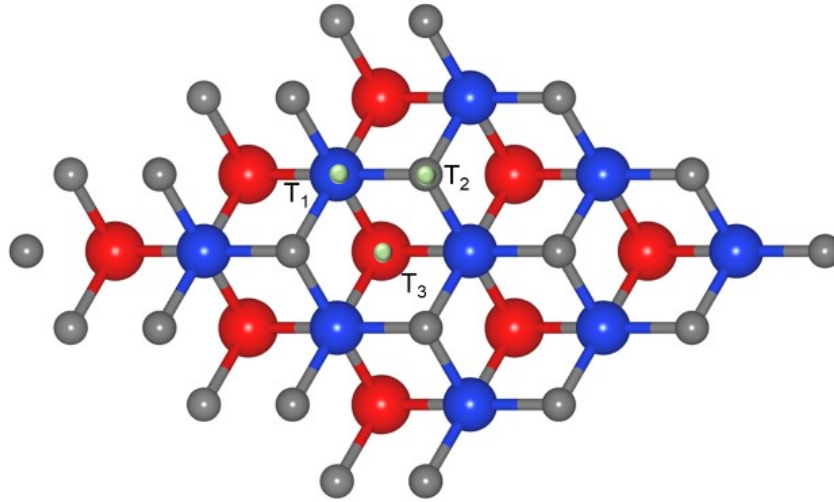

**Fig. S4.** The top and side views of the most stable adsorption configuration for the  $\text{MX}_2\text{Y}_4$  monolayer. The red, blue and gray balls represent the M, X and Y atoms, respectively.

**Table S2** The PBE calculated effective mass ( $m$ ,  $m_e$ ), deformation potential constant ( $E$ , eV), elastic modulus ( $C$ , N/m) and the carrier mobility ( $\mu$ ,  $\text{cm}^2 \cdot \text{V}^{-1} \cdot \text{s}^{-1}$ ) for the hole (h) and the electron (e) of the  $\text{MX}_2\text{Y}_4$  monolayer along the transport directions.

| materials                  | direction | carrier | $m$   | $E$   | $C$ | $\mu$ |
|----------------------------|-----------|---------|-------|-------|-----|-------|
| $\text{CrSi}_2\text{N}_4$  | $x$       | $e^-$   | 1.84  | 1.59  | 503 | 826   |
|                            |           | $h^+$   | -3.50 | 2.53  |     | 85    |
|                            | $y$       | $e^-$   | 1.88  | -4.08 | 511 | 125   |
|                            |           | $h^+$   | -4.04 | 2.53  |     | 75    |
| $\text{HfSi}_2\text{N}_4$  | $x$       | $e^-$   | 1.86  | 3.59  | 451 | 206   |
|                            |           | $h^+$   | -0.55 | 2.87  |     | 1182  |
|                            | $y$       | $e^-$   | 0.90  | -2.37 | 447 | 966   |
|                            |           | $h^+$   | -2.63 | 1.69  |     | 706   |
| $\text{MoGe}_2\text{N}_4$  | $x$       | $e^-$   | 0.79  | -2.82 | 428 | 1226  |
|                            |           | $h^+$   | -0.95 | 2.34  |     | 1248  |
|                            | $y$       | $e^-$   | 0.79  | -2.83 | 428 | 1225  |
|                            |           | $h^+$   | -0.94 | 2.56  |     | 1045  |
| $\text{MoSi}_2\text{As}_4$ | $x$       | $e^-$   | 0.54  | -4.69 | 181 | 386   |
|                            |           | $h^+$   | -0.42 | -2.77 |     | 1874  |
|                            | $y$       | $e^-$   | 0.57  | -4.25 | 180 | 446   |
|                            |           | $h^+$   | -0.44 | -3.02 |     | 1476  |
| $\text{MoSi}_2\text{N}_4$  | $x$       | $e^-$   | 0.45  | -4.62 | 531 | 1730  |
|                            |           | $h^+$   | -1.75 | 3.8   |     | 172   |
|                            | $y$       | $e^-$   | 0.46  | -4.61 | 533 | 1721  |
|                            |           | $h^+$   | -1.73 | 3.8   |     | 174   |
| $\text{MoSi}_2\text{P}_4$  | $x$       | $e^-$   | 0.33  | -5.43 | 216 | 932   |
|                            |           | $h^+$   | -0.35 | -3.59 |     | 1889  |
|                            | $y$       | $e^-$   | 0.34  | -6.01 | 215 | 736   |
|                            |           | $h^+$   | -0.37 | -3.26 |     | 2169  |
| $\text{TiSi}_2\text{N}_4$  | $x$       | $e^-$   | 2.69  | 2.95  | 480 | 141   |
|                            |           | $h^+$   | -5.14 | -0.6  |     | 1695  |
|                            | $y$       | $e^-$   | 1.59  | -0.45 | 484 | 10370 |
|                            |           | $h^+$   | -0.92 | 2.05  |     | 815   |
| $\text{WSi}_2\text{N}_4$   | $x$       | $e^-$   | 0.34  | -5.7  | 557 | 2172  |
|                            |           | $h^+$   | -1.53 | 4.05  |     | 205   |
|                            | $y$       | $e^-$   | 0.34  | -5.7  | 556 | 2162  |
|                            |           | $h^+$   | -1.55 | 4.05  |     | 203   |
| $\text{ZrSi}_2\text{N}_4$  | $x$       | $e^-$   | 1.83  | 4.44  | 427 | 93    |
|                            |           | $h^+$   | -3.84 | 2.67  |     | 76    |
|                            | $y$       | $e^-$   | 1.82  | -2.71 | 427 | 250   |
|                            |           | $h^+$   | -2.25 | 1.15  |     | 694   |

**Table S3** The calculated most favorable adsorption sites and the Gibbs free energy of the H adsorbed  $\text{MX}_2\text{Y}_4$  monolayer system.

| Monolayer                  | Site         | Gibbs free energy (eV) |
|----------------------------|--------------|------------------------|
| $\text{CrSi}_2\text{N}_4$  | $\text{T}_2$ | 4.158                  |
| $\text{HfSi}_2\text{N}_4$  | $\text{T}_3$ | 0.228                  |
| $\text{MoGe}_2\text{N}_4$  | $\text{T}_2$ | 1.269                  |
| $\text{MoSi}_2\text{As}_4$ | $\text{T}_3$ | 1.481                  |
| $\text{MoSi}_2\text{N}_4$  | $\text{T}_2$ | 2.326                  |
| $\text{MoSi}_2\text{P}_4$  | $\text{T}_1$ | 1.468                  |
| $\text{TiSi}_2\text{N}_4$  | $\text{T}_1$ | 0.078                  |
| $\text{WSi}_2\text{N}_4$   | $\text{T}_2$ | 2.576                  |
| $\text{ZrSi}_2\text{N}_4$  | $\text{T}_1$ | -0.035                 |
